# Supplementary material for: Effective Photodynamic Therapy for Colon Cancer Cells Using Chlorin e6 Coated Hyaluronic Acid-Based Carbon Nanotubes
Source: MDPI journal article supplement (doi:10.3390/ijms21134745), 2020-07-03
Supplement: s1 [file s1]

**Supplementary information**

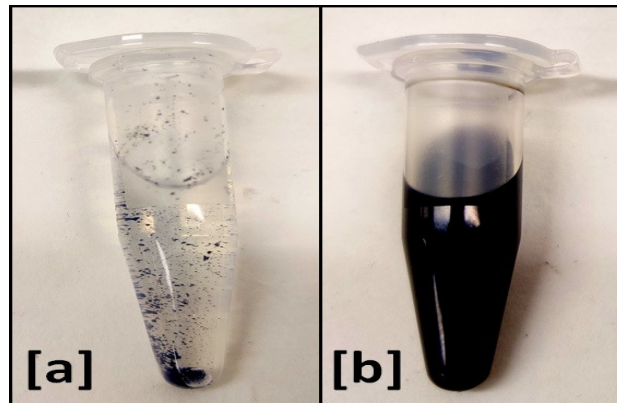

Figure S1. [a] SWCNTs and [b] SWCNTs-HA-Ce6. The dispersion was diluted at a concentration of 1mg/ml at room temperature.
